# Supplementary material for: VEGF-A regulated by progesterone governs uterine angiogenesis and vascular remodelling during pregnancy
Source: PubMed Central journal article supplement (PMC3799495; doi:10.1002/emmm.201302618), 2013-08-02
Supplement: emmm0005-1415-SD2.pdf [file emmm0005-1415-SD2.pdf]

*Supplementary Information*

**VEGF-A Regulated by Progesterone Governs Uterine Angiogenesis and  
Vascular Remodeling during Pregnancy**

Minah Kim, Hyeung Ju Park, Jae Won Seol, Jeon Yeob Jang, Young-Suk Cho,  
Kyu Rae Kim, Youngsok Choi, John P. Lydon, Francesco J. DeMayo, Masabumi Shibuya,  
Napoleone Ferrara, Hoon-Ki Sung, Andras Nagy, Kari Alitalo, Gou Young Koh

Contents

1. Supplementary Figure 1
2. Supplementary Figure 2
3. Supplementary Figure 3
4. Supplementary Figure 4
5. Supplementary Figure 5
6. Supplementary Figure 6
7. Supplementary Figure 7
8. Supplementary Table 1

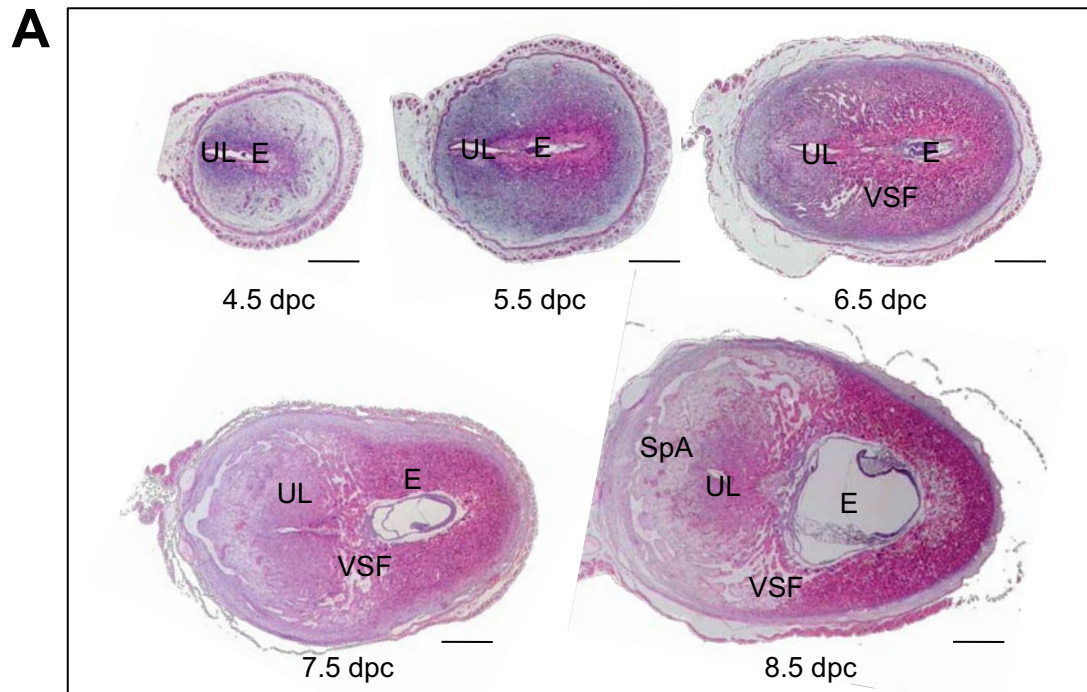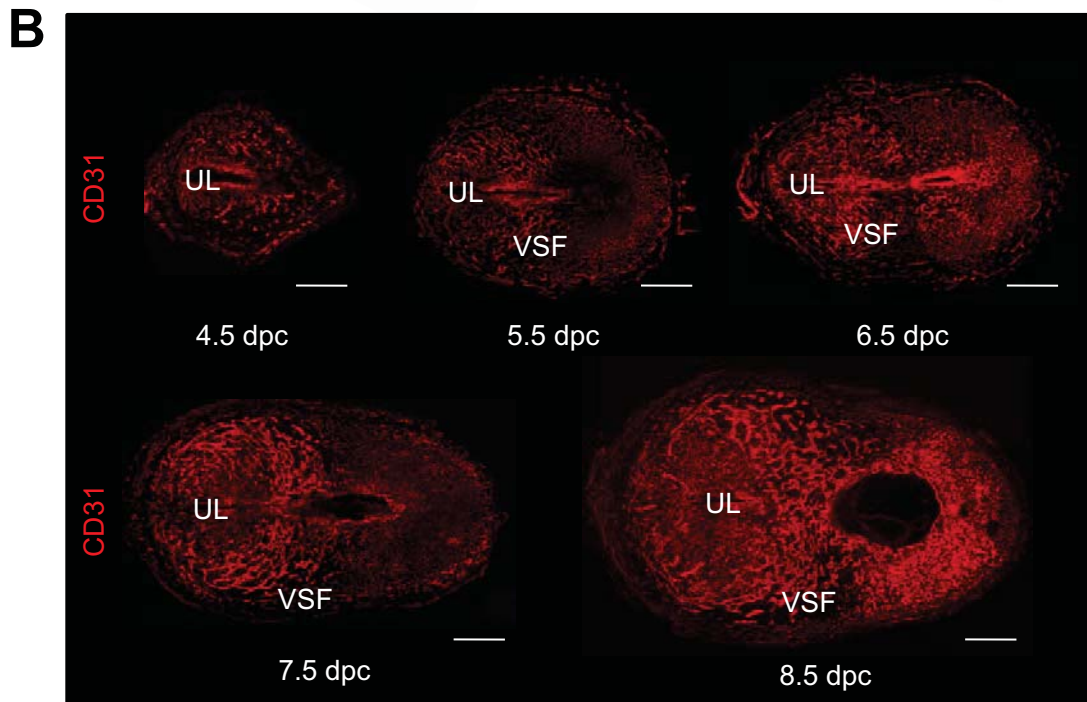

**Supplementary Figure 1. Dynamic growth of uterine size and BVs during early pregnancy in mouse.**

(A) Cross sectioned uteri from 4.5 to 8.5 dpc stained with hematoxylin and eosin. UL, uterine lumen; E, embryo.

(B) Representative images showing CD31<sup>+</sup> BVs in the uteri from 4.5 to 8.5 dpc. All scale bars, 500  $\mu$ m.

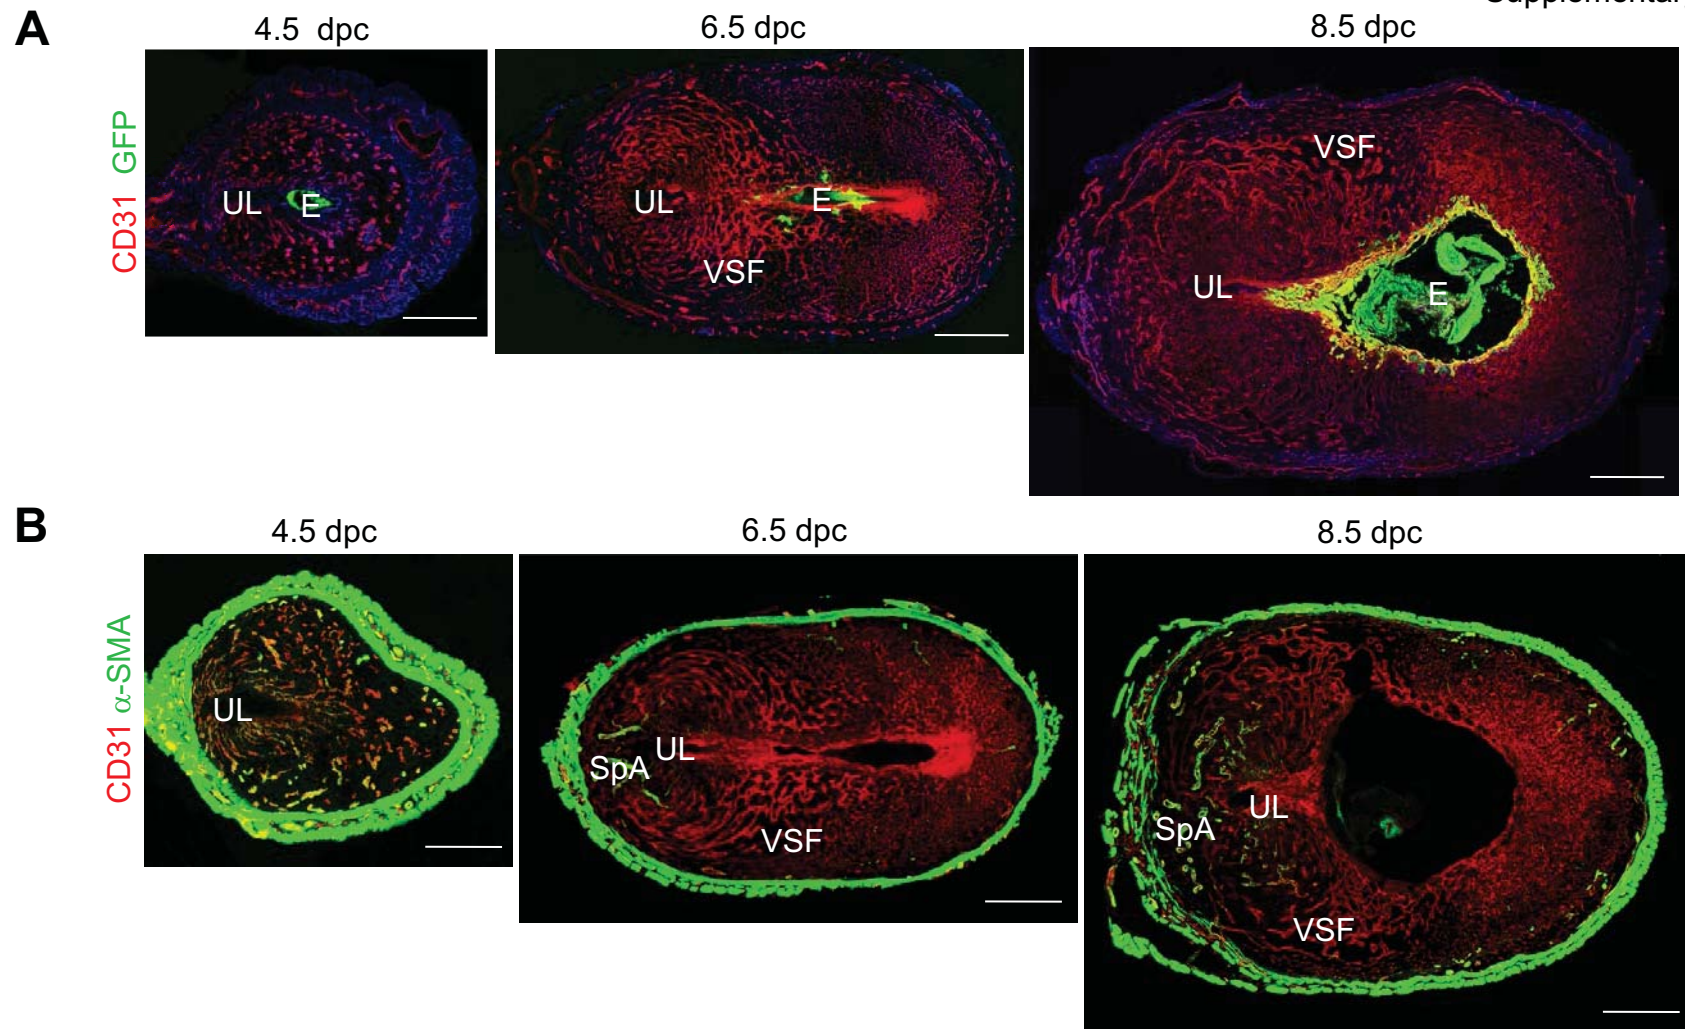

**Supplementary Figure 2. Demarcation of BVs from fetus-derived placenta, and distributions of  $\alpha$ -SMA<sup>+</sup> mural cells and SpA in pregnant uteri.** (A) Images showing CD31<sup>+</sup> BVs and GFP<sup>+</sup> embryo in the uteri at 4.5, 6.5 and 8.5 dpc. Female mice were mated with male GFP<sup>+</sup> mice. UL, uterine lumen; E, embryo. (B) Images showing CD31<sup>+</sup> BVs and  $\alpha$ -SMA<sup>+</sup> mural cells at 4.5, 6.5 and 8.5 dpc. All scale bars, 500  $\mu$ m. SpA, spiral artery.

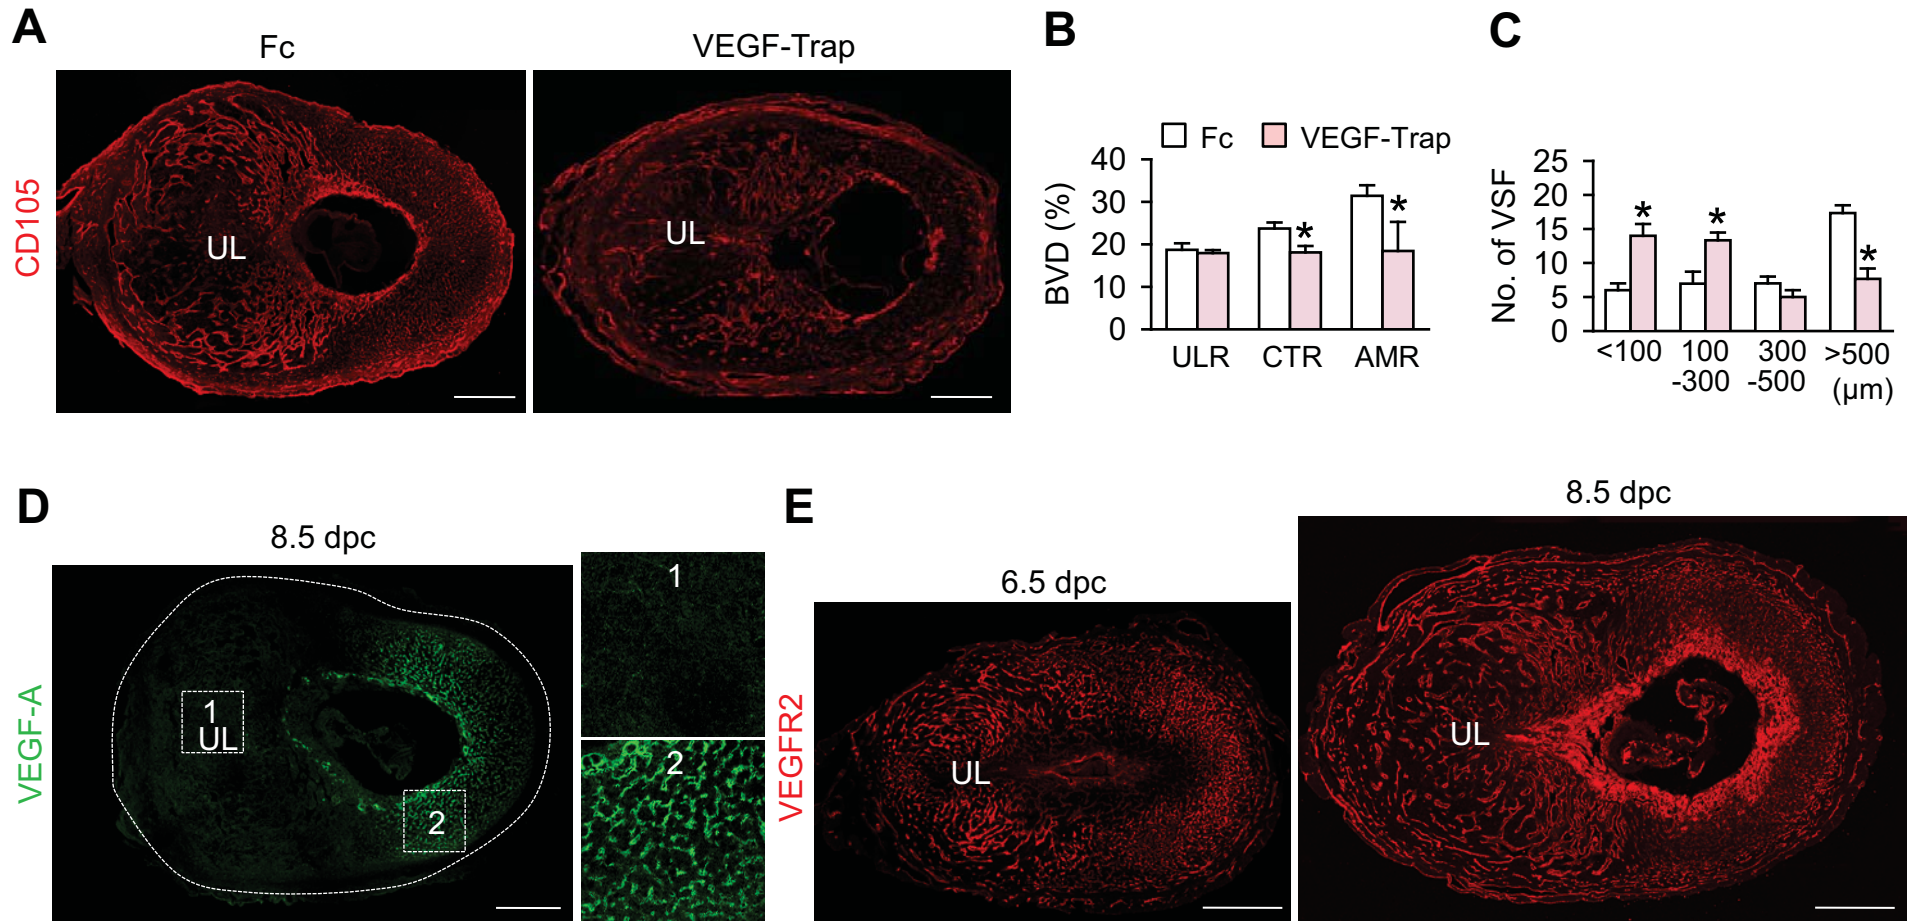

**Supplementary Figure 3. Role of VEGF-A in decidual angiogenesis and EEVSF, and immunohistochemical localizations of VEGF-A and VEGFR in the pregnant uteri.** (A) Images showing CD105<sup>+</sup> BVs in the uteri at 8.5 dpc treated with Fc and VEGF-Trap at 6.5 dpc. (B and C) Comparisons of CD105<sup>+</sup> BVD (%) in each region, and numbers of different sized VSFs in the CTR. Each group, n = 3. \*p < 0.04 versus Fc by one-way ANOVA. (D) Images showing VEGF-A distribution in the uterus at 8.5 dpc. (E) Images showing VEGFR2 distributions in the uterus at 6.5 and 8.5 dpc. Each numbered region (square-dotted line) is magnified and arrayed in right. All scale bars represent 500 μm.

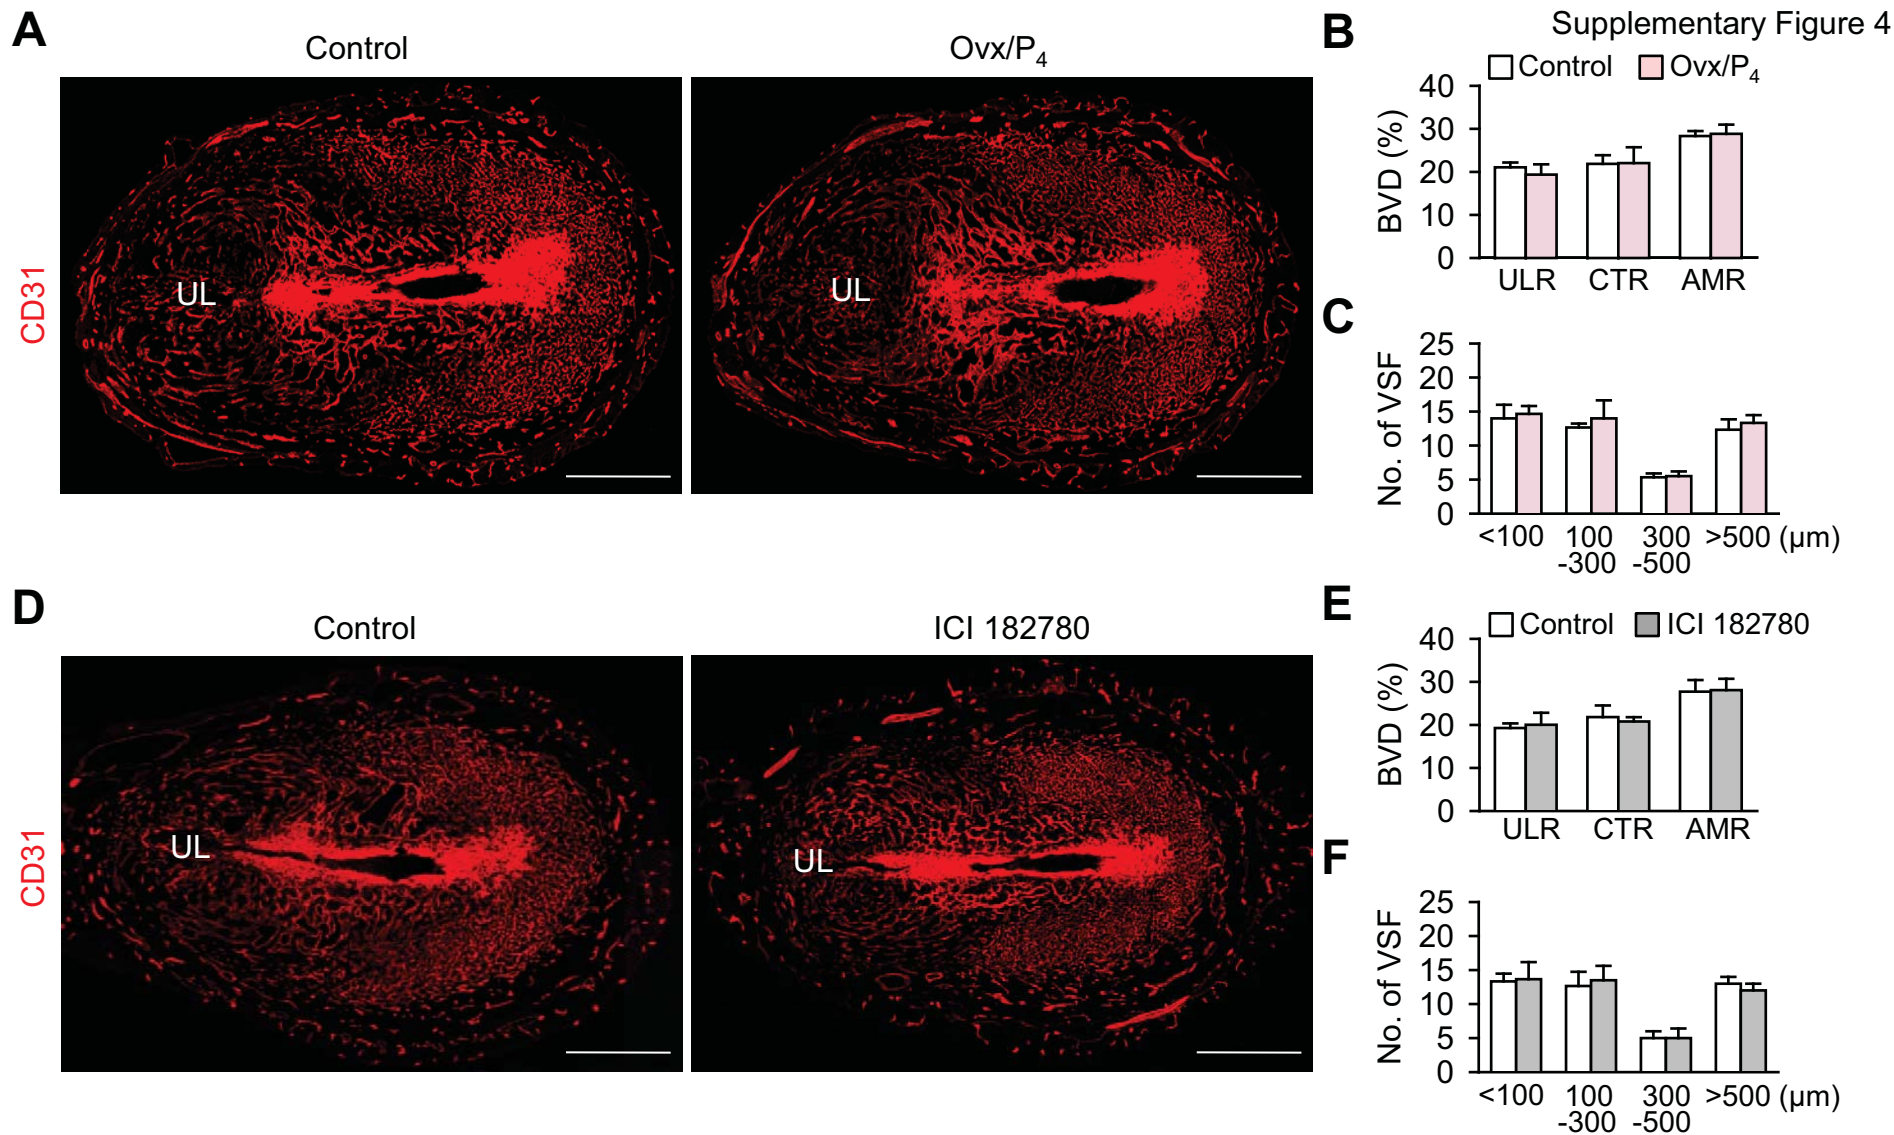

**Supplementary Figure 4. Ovary-secreting E2 does not governs decidual angiogenesis and EEVSF during early post-implantation period.** (A) Images comparing CD31<sup>+</sup> BVs in the uteri at 6.5 dpc of sham-operated Control and ovariectomized (Ovx) mice supplemented with P4 (Ovx/ P4). UL, uterine lumen. Scale bars, 500 μm. (B and C) Comparisons of CD31<sup>+</sup> BVD (%) in the ULR, CTR and AMR, and numbers of different sized VSFs in the CTR at 6.5 dpc in Control and Ovx/ P4 mice. Each group, n = 4. (D) Images comparing CD31<sup>+</sup> BVs in the uteri at 6.5 dpc treated with control and ICI 182780. Scale bars, 500 μm. (E and F) Comparisons of CD31<sup>+</sup> BVD (%) in the ULR, CTR and AMR, and numbers of different sized VSFs in the CTR at 6.5 dpc in control and ICI 182780. Each group, n = 4.

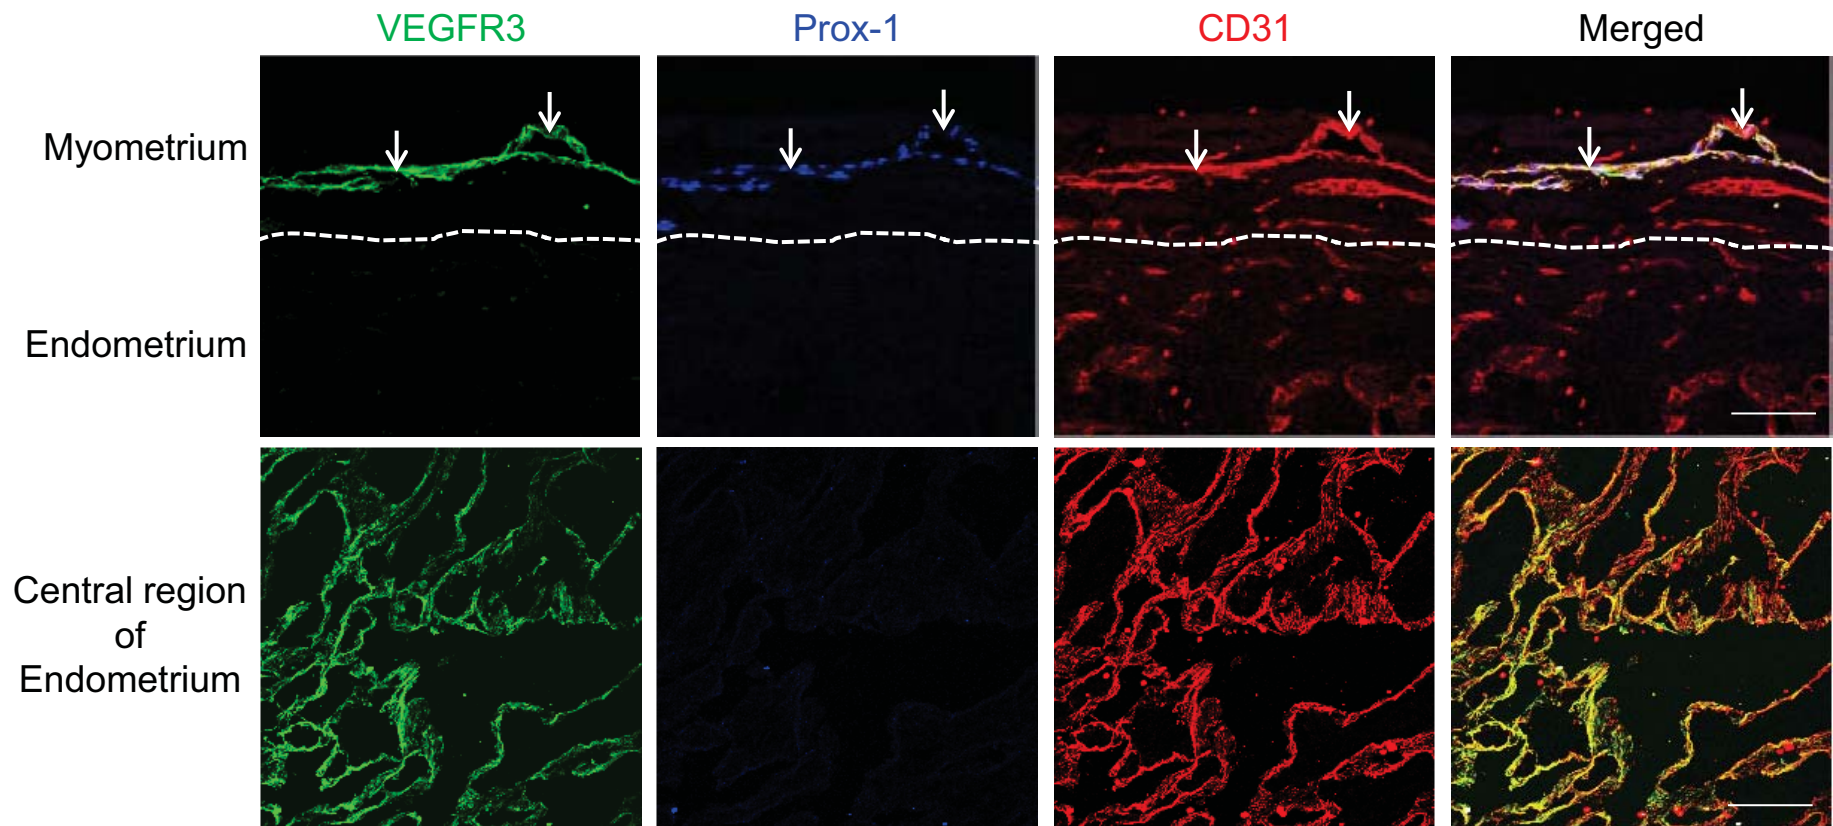

**Supplementary Figure 5.** Images showing VEGFR3<sup>+</sup>/Prox-1<sup>+</sup>/CD31<sup>+</sup> lymphatic vessels (arrows) in the myometrium and VEGFR3<sup>+</sup>/Prox-1<sup>-</sup>/CD31<sup>+</sup> VSF in the CTR of endometrium at 8.5 dpc. Scale bars, 100  $\mu$ m.

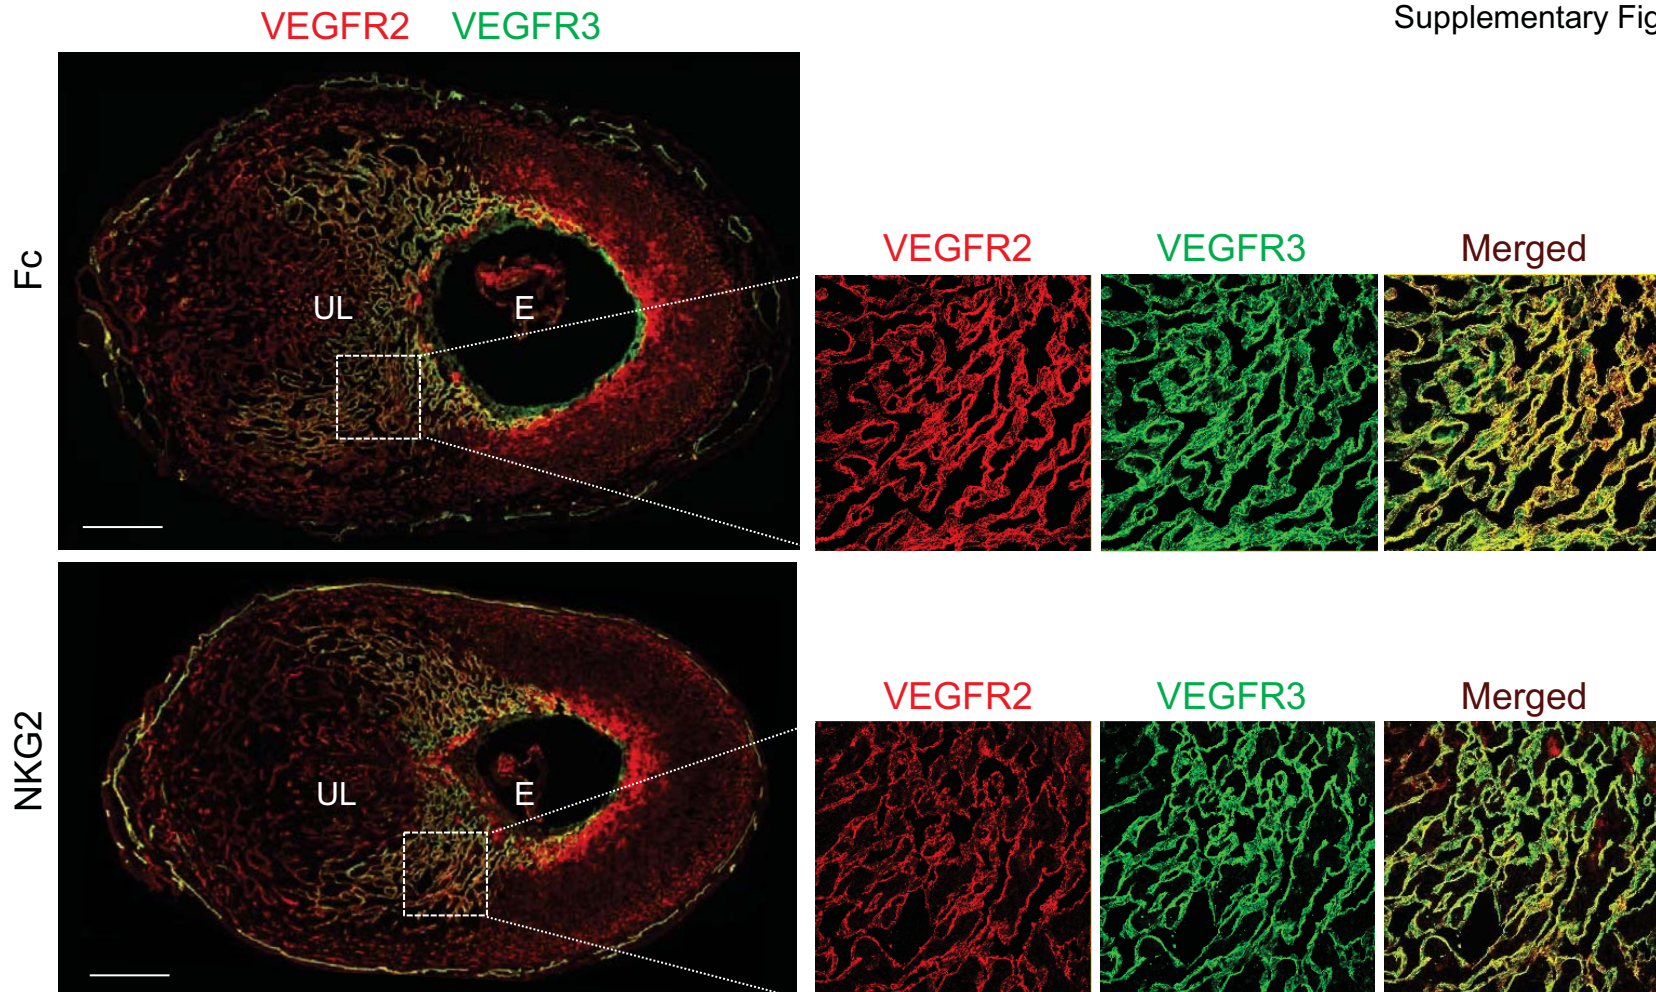

**Supplementary Figure 6. Depletion of uNK cells does not reduce expressions of VEGFR2 and VEGFR3 in the vascular sinus folding of pregnant uteri.** Images showing VEGFR2 and VEGFR3 expressions in the uteri at 8.5 dpc treated with Fc and anti-NKG2D antibody at 6.5 and 7.5 dpc (twice a day). Each square region (white-dotted line) is magnified in the right side. E, embryo. UL, uterine lumen. Scale bars, 500  $\mu$ m. Three independent experiments show similar findings.

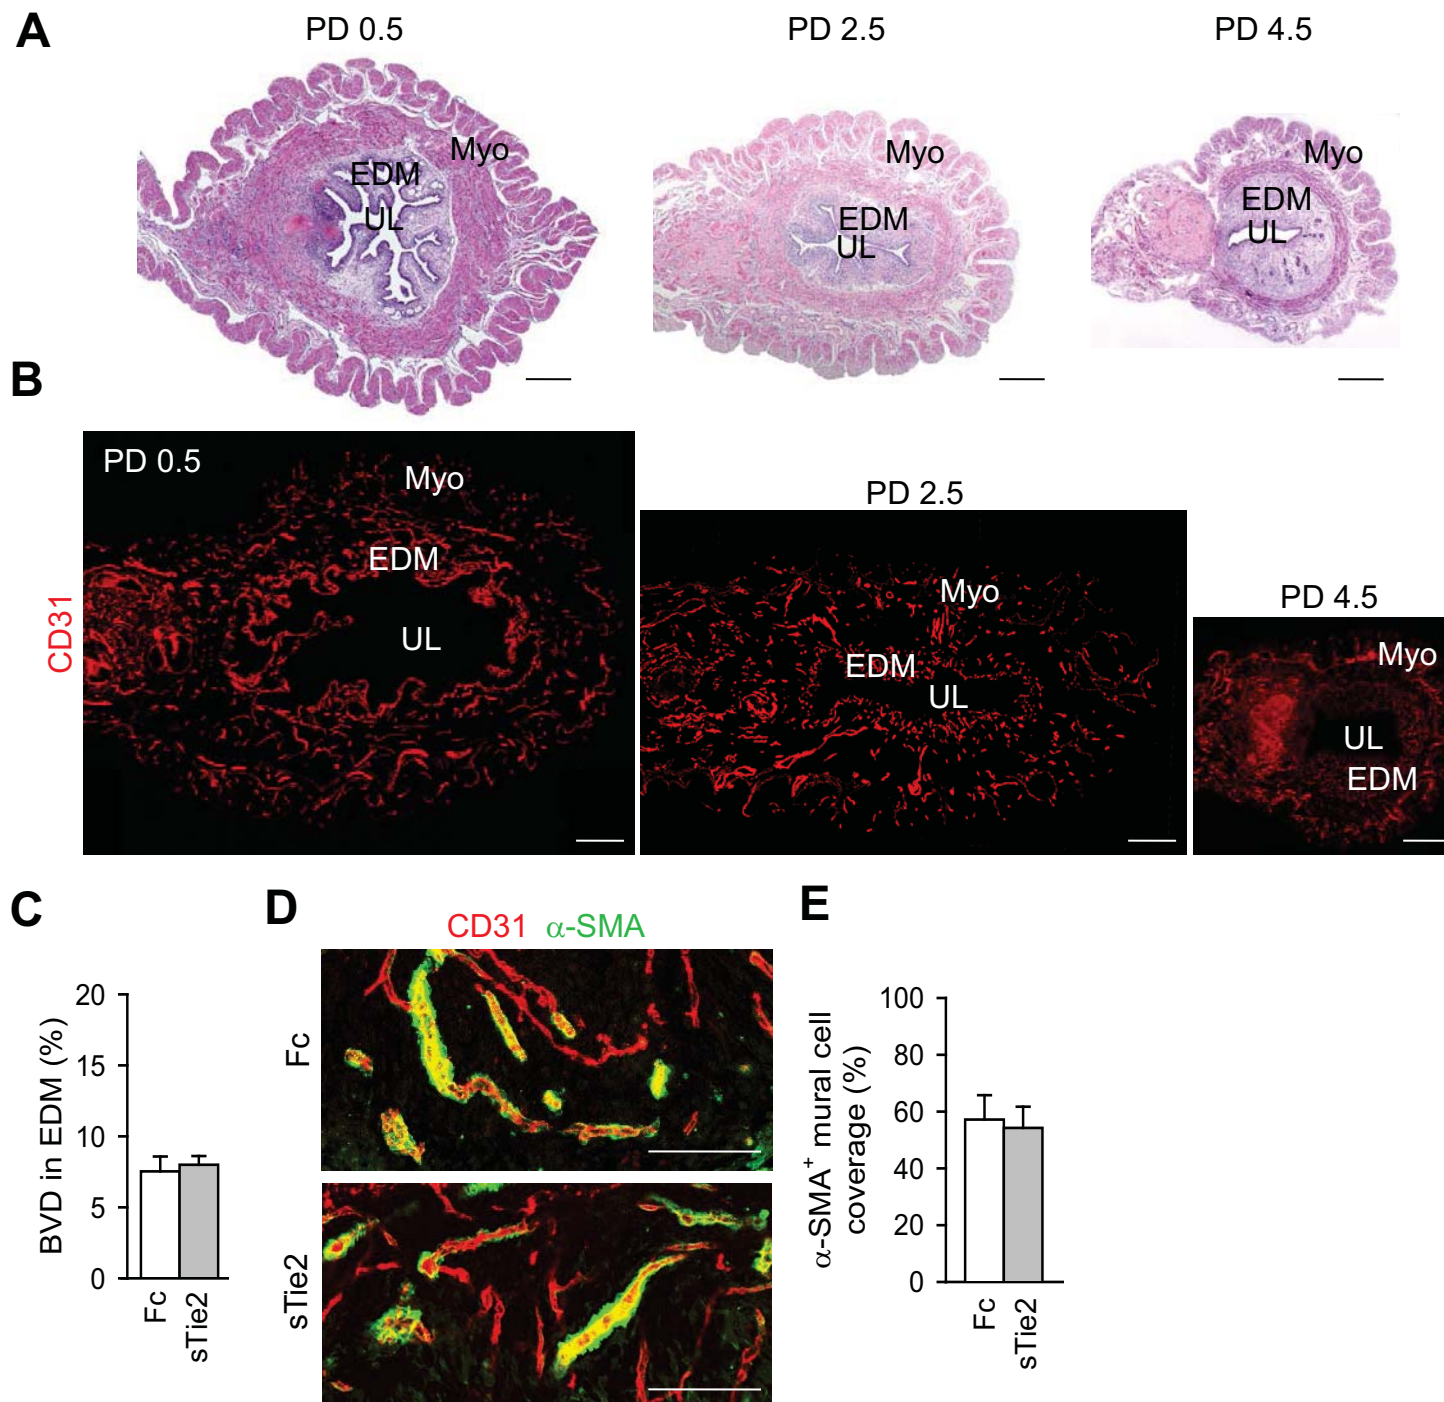

**Supplementary Figure 7. Normalization of uterine size and BVs, and roles of Ang1, Ang2 and Tie2 during postpartum period. (A and B)** Cross sectioned uteri at PD 0.5, 2.5 and 4.5 stained with hematoxylin and eosin and for CD31<sup>+</sup> BVs. Scale bars, 500  $\mu$ m. Myo, myometrium; EDM, endometrium; UL, uterine lumen. **(C)** Comparison of CD31<sup>+</sup> BVD (%) in the endometrium at PD 2.5 treated with Fc and sTie2. Each group, n = 3. **(D)** Images showing coverage of  $\alpha$ -SMA<sup>+</sup> mural cells on CD31<sup>+</sup> BVs in the endometrium at PD 2.5 treated with Fc and sTie2. Scale bars, 100  $\mu$ m. **(E)** Comparison of coverage of  $\alpha$ -SMA<sup>+</sup> mural cells on CD31<sup>+</sup> BVs (%) in the endometrium at PD 2.5 treated with Fc and sTie2. Each group, n = 3.



**Table S1. Effects of various agents on decidual angiogenesis, EEVFS, and embryo resorption**

| Mouse     | Agent      | Dosage    | Time of Administration | Time of Sacrifice | Decidual Angiogenesis EEVFS | Embryo Resorption* | n  |
|-----------|------------|-----------|------------------------|-------------------|-----------------------------|--------------------|----|
| C57BL/6   | VEGF-Trap  | 25 mg/kg  | 4.5 dpc                | 6.5 dpc           | Moderate impairment         | 42.8%              | 8  |
| C57BL/6   | VEGF-Trap  | 25 mg/kg  | 6.5 dpc                | 8.5 dpc           | Minor impairment            | <5%                | 3  |
| C57BL/6   | sVEGFR3    | 25 mg/kg  | 6.5 dpc<br>7.5 dpc     | 8.5 dpc           | No impairment               | <5%                | 4  |
| CD11c:DTR | DT         | 2 ng/g    | 4.5 dpc                | 6.5 dpc           | Severe impairment           | 100%               | 3  |
| CD11c:DTR | DT         | 2 ng/g    | 5.5 dpc                | 6.5 dpc           | No impairment               | <5%                | 4  |
| CD11c:DTR | DT         | 2 ng/g    | 6.5 dpc                | 8.5 dpc           | No impairment               | <5%                | 3  |
| C57BL/6   | NKG2D      | 7.5 mg/kg | 6.5 dpc<br>7.5 dpc     | 8.5 dpc           | Minor impairment            | <5%                | 4  |
| C57BL/6   | P4         | 25 mg/kg  | 4.5 dpc<br>5.5 dpc     | 6.5 dpc           | Enhanced                    | <5%                | 4  |
| C57BL/6   | RU486      | 8 mg/kg   | 5.5 dpc                | 6.5 dpc           | Moderate impairment         | 28.5%              | 12 |
| C57BL/6   | ICI 182780 | 1 mg/kg   | 5.5 dpc                | 6.5 dpc           | No impairment               | <5%                | 4  |

\*Embryo resorption is defined as undersized and abnormal shaped conceptus.
